# Supplementary material for: Analysis of Whitefly Transcriptional Responses to Beauveria bassiana Infection Reveals New Insights into Insect-Fungus Interactions
Source: PubMed Central journal article supplement (PMC3702578; doi:10.1371/journal.pone.0068185), 2013-07-05

# Supplementary Figure 1

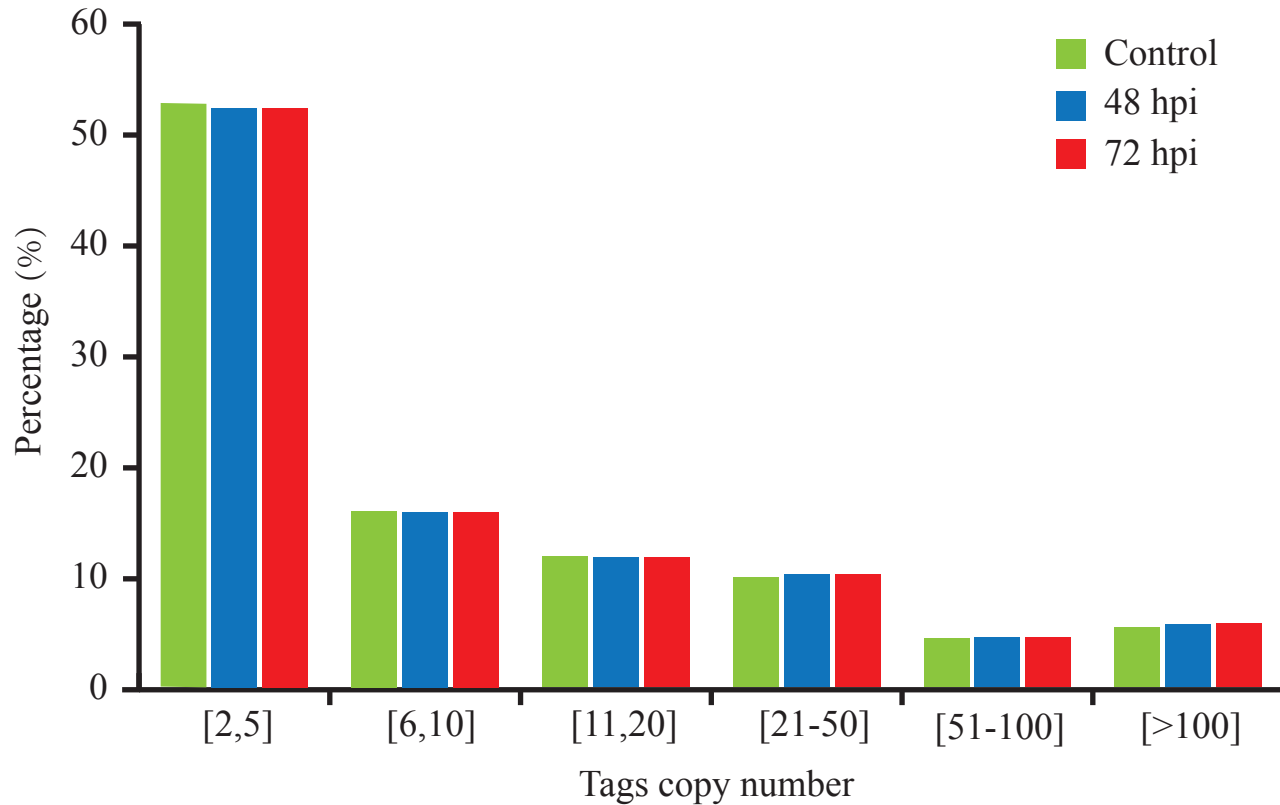

Supplement: pone.0068185.s001.pdf [file pone.0068185.s001.pdf]
